# Supplementary material for: Primary productivity measurements in the Ross Sea, Antarctica: A regional synthesis
Source: Copernicus journal article supplement (doi:10.5194/essd-2021-351), 2021-11-09
Supplement: Supplementary file [file essd-2021-351-AC3-supplement.pdf]

# Primary productivity measurements in the Ross Sea, Antarctica: A regional synthesis

Walker O. Smith, Jr.<sup>1,2</sup>

<sup>1</sup> School of Oceanography, Shanghai Jiao Tong University, Shanghai, 200300, PRC

5 <sup>2</sup> Virginia Institute of Marine Science, William & Mary, Gloucester Pt., VA, 23062, USA

*Correspondence to:* Walker O. Smith, Jr. (wos@vims.edu)

**Abstract.** Polar systems are undersampled due to the difficulty of sampling remote and challenging environments; however, these systems are critical components of global biogeochemical cycles. Measurements on primary productivity in specific areas can quantify the input of organic matter to food webs, and so are of critical ecological importance as well. However, long-term measurements using the same methodology are available only for a few polar systems. Primary productivity measurements using <sup>14</sup>C-uptake incubations from the Ross Sea, Antarctica, are synthesized, along with chlorophyll concentrations at the same depths and locations. A total of 19 independent cruises were completed, and 449 stations occupied where measurements of primary productivity (each with 7 depths) were completed. The incubations used the same basic simulated *in situ* methodology for all. Integrated water column productivity for all stations averaged  $1.10 \pm 1.20 \text{ g C m}^{-2} \text{ d}^{-1}$ , and the maximum was  $13.1 \text{ g C m}^{-2} \text{ d}^{-1}$ . Annual productivity calculated from the means throughout the growing season equalled  $146 \text{ g C m}^{-2} \text{ yr}^{-1}$ . Mean chlorophyll concentration in the euphotic zone (the 1% irradiance level) was  $2.85 \pm 2.68 \text{ mg m}^{-3}$  (maximum concentration was  $19.1 \text{ mg m}^{-3}$ ). Maximum photosynthetic rates at the surface (normalized to chlorophyll) averaged  $0.94 \pm 0.71 \text{ mg C (mg chl)}^{-1} \text{ h}^{-1}$ , similar to the maximum rate found in photosynthesis/irradiance measurements. Productivity measurements are consistent with the temporal patterns of biomass found previously, with biomass and productivity peaking in late December; mixed layers were at a minimum at this time as well. Estimates of plankton composition also suggest that pre-January productivity was largely driven by the haptophyte *Phaeocystis antarctica*, and summer productivity by diatoms. The data set will be useful for a comparison to other Antarctic regions and provide a basis for refined bio-optical models of regional primary productivity.

## 1 Introduction

25 A quantitative assessment of the ocean's primary productivity (the rate at which carbon dioxide is reduced to organic matter by marine phytoplankton photosynthesis) is a critical variable in understanding the ecology and biogeochemistry in marine systems. Phytoplankton, being the base of marine food webs, grow at different rates in the ocean, rates that are regulated by temperature, nutrients, and irradiance; they are in turn grazed by herbivorous organisms that both incorporate the autotrophic organic matter into their own tissues, as well as recycle it by oxidizing a portion for energy use and release

30 inorganic materials back into the ocean. Phytoplankton are also critical to marine elemental cycles, as they are central in  
cycling carbon, nitrogen, phosphorus, iron, and all bio-active elements. In the carbon cycle they not only fix CO<sub>2</sub> into organic  
matter, but release dissolved organic matter that is used by heterotrophic microbes. They also can sink and be incorporated  
into larger particles, and the flux of organic material to depth is the essential driver of what is known as the biological pump  
(Basu and Mackey, 2018). The processes that contribute to the vertical movement of organic matter can sequester carbon from  
35 the atmosphere for periods from years to centuries.

Primary productivity in the ocean traditionally has been measured by collecting water, adding a radioactive tracer, and  
incubating samples in the irradiance environment from which the sample was taken, and quantifying the radioactive uptake  
after incubation. This procedure was introduced by Steemann Nielsen (1952) and has been applied to nearly every ocean  
numerous times. However, the ocean is far too large to measure productivity synoptically, and as a result numerous bio-optical  
40 models have been derived to estimate primary productivity using remotely sensed information (temperature, chlorophyll  
concentrations, irradiance; e.g., Behrenfeld and Falkowski, 1997a,b). These models have enabled oceanographers to estimate  
productivity on large space and time scales, and have also been used in more restricted analyses of productivity (Mouw and  
Yoder, 2005; Smith et al., 2021; Oliver et al., 2021). Two critical aspects of the original Behrenfeld and Falkowski (1997a,b)  
models were based on results from primary productivity measurements that used <sup>14</sup>C-uptake – the relationship between the  
45 maximum rate of photosynthesis as a function of temperature (fitted to a 7<sup>th</sup>-order polynomial) and the photoinhibition estimate.

Carbon radioisotope measurements of primary productivity are extremely sensitive, and other methods (e.g., oxygen  
changes) cannot discriminate the small changes that characterize many ocean systems. As a result, a comparison among  
different procedures has been difficult. Numerous questions about the interpretation of <sup>14</sup>C-data also have been posed. For  
example, concerns were expressed with regard to whether the method measured net or gross production, the effects of light  
50 and dark respiration, and the impact of heterotrophic plankton (Marra, 2009). While these uncertainties have been repeatedly  
acknowledged, it appears that long (e.g., 24-h) measurements approximate net production, but this has not been rigorously  
examined in polar systems.

Methods measuring <sup>14</sup>C-uptake vary among different investigators. Some studies used *in situ* incubations where samples  
were returned to the ocean at the depths from which they were taken, thus insuring that the same irradiance environment (Marra  
55 et al., 2021), while others use neutral density screens and on-deck incubators that are cooled by running seawater (e.g., Barber  
et al., 1997). Some studies use blue filters to correct for changes in spectral quality within the water column, while others do  
not. Older studies used small glass bottles, but it was subsequently determined that trace metals could bind to glass and  
potentially alter estimates or productivity. Bottle size also was shown to be important, as small bottles tended to result in the  
death of microzooplankton and disrupt the cycling of nitrogen (Eppley, 1982). Length of incubation is also variable, with  
60 some measurements being relatively short (6 h or less) while others encompass the entire 24 h photoperiod. Time of sampling  
also varied, with some trying to sample at dawn (but using irradiance profiles from the previous day), where others sample  
whenever possible. All methods enclose samples in bottles and thus remove the plankton from the natural, turbulent  
environment. As a result, these differences create challenges when comparing productivity estimates.

Polar regions are even more challenging with regard to measurements of primary productivity. Cruises to remote regions  
65 are infrequent, and often completed during the summer when ice is reduced or absent, and storms less frequent. The  
environmental features of polar systems are also unusual. For example, low temperatures mean that growth rates tend to be  
slow, and 24-h incubations are often used. Irradiance durations are also diverse, as photoperiods in many polar settings during  
summer are 24 h (although local noon irradiance values are at least an order of magnitude greater than local midnight). Ice,  
when encountered, greatly reduces the *in situ* irradiance, and thus on-deck incubations may not truly represent the irradiance  
70 environment from which samples were taken.

This report summarizes rate measurements collected from a relatively small polar region, the Ross Sea, Antarctica. While  
the Ross Sea is small, it is considered to be the most important regions for the removal of CO<sub>2</sub> from the atmosphere as a result  
of its large productivity (Arrigo et al., 2008). It also has been studied intensively since the first International Geophysical Year  
in 1958. The measurements synthesized here were done by a single investigator, using methods that were the largely the same  
75 over the span of ca. 25 years. They are not continuous through space or time, but represent a unique data set that should be of  
use to those interested in validating remote sensing-based productivity models of the region.

## 2 Data

Primary productivity was measured on 19 cruises in the Ross Sea, Antarctica (Table 1) from 1983 – 2006 using simulated  
*in situ* incubations (e.g., Smith et al., 2000). All stations (n = 492) included in this analysis were located on the continental  
80 shelf (Fig. 1). Samples were taken from known isolumes (determined usually by photosynthetically active radiation (PAR)  
sensors on the CTD-Niskin system, but in the 1980 cruises by use of a Secchi disk), inoculated with ca. 100 μCi HCO<sub>3</sub><sup>-</sup> in 5%  
KCl (pH 9.6), and incubated for 24 h. In the earliest cruises 125 mL glass bottles were used, but after 1990 plastic bottles  
were adopted. Either individual bottles were wrapped in neutral density screens, or incubators had tubes that were wrapped in  
neutral density screens and unwrapped bottles placed inside. After 1992 all incubators used blue filters as well at isolumes of  
85 30% and below. During all cruises except NBP97-02, photoperiods were 24 h, and therefore samples were collected  
independent of local time; incubations began less than 20 minutes after sample collection. On all cruises additional  
phytoplankton variables were measured (e.g., chlorophyll, particulate organic carbon and nitrogen, biogenic silica,  
photosynthetic pigments, taxonomic composition), but only chlorophyll concentrations, mixed layer depths, and the dominant  
phytoplankton group are reported herein. Routine oceanographic data (temperature, salinity, oxygen profiles) are also  
90 available for each cruise, as well as additional particulate material analyses.

Ice concentrations were variable during the cruises. During some stations ice cover was 100% (e.g., all stations during  
NBP97-02), and in others ice was absent. Most cruises included stations that were in variable ice cover as well as open water.  
Sampling in ice-covered waters is possible and routine, as long as the CTD can access water; however, determining the *in situ*  
irradiance is not direct using routine ship methodologies. Even in ice-covered waters, the CTD-derived PAR determinations  
95 of irradiance were used to sample. These estimates of isolumes likely overestimated the actual depth of isolumes, but the

degree of overestimation is unknown. For example, in waters with 10% ice cover, measured isolume depths are likely accurate, but in regions with 80% ice cover and more, isolume depths likely vary from the true depths (Smith, 1995).

100 Incubations present additional challenges. For example, during periods when snowfall is heavy and incubators with lids are used, snow can accumulate rapidly and greatly reduce irradiance penetration into the incubator and samples. This is not common, but certainly occurs. Another challenge involves the flowing seawater system. In periods such as autumn and early spring when atmospheric temperatures are substantially less than those of the surface water (-1.8°C), the seawater that is normally circulating around samples to keep them at the surface temperature can freeze, usually in the incubator outflow and inflow lines, and when this happens the entire incubator can freeze quickly. Normal cautions of shading of incubators by the ship superstructure also need to be considered, given the low sun angles found for much of the photoperiod. Barber et al. 105 (1997) found that reflection of ship structures actually increased irradiance in the incubators.

Most cruises collected samples from 100, 50, 30, 15, 5, 1 and 0.1% of surface irradiance, but others had slightly modified isolumes. The lowest isolume (0.1%) used was based on the report of El-Sayed et al. (1983) who found significant <sup>14</sup>C-assimilation below the 1% isolume. Given that Antarctic phytoplankton were assumed to be acclimated to low irradiance levels, the 0.1% was adopted for most cruises. For simplicity in analyses, samples from 25 and 23% of surface irradiance were 110 pooled, as were those from 16 and 15%, 10 and 7%, and 2 and 1%.

After incubation, samples were removed and filtered through 25 mL GF/F filters under low (< 1/3 atm.) vacuum, rinsed with ca. 5 mL 0.01N HCL in cold (0°C) seawater to remove any inorganic carbon adhering to the filter, and placed in scintillation vials (either 7 or 20 mL). Samples had an appropriate volume of liquid scintillation cocktail added, placed in the dark for at least 24 h to reduce chemiluminescence, and then counted on a liquid scintillation counter. Total added  $HCO_3^-$  was 115 determined by adding 0.1 mL unfiltered sample to a base trap ( $\beta$ -phenethylamine was most commonly used), and a hydrophilic LSC fluor added and treated in a similar manner as the filters. All calculations accounted for isotope discrimination. Chlorophyll was quantified using fluorometric techniques (Knap et al., 1996) where samples were filtered through 25 mm GF/F filters, extracted in 90% acetone for 24 h in the dark at 0°C, and the fluorescence measured before and after acidification. All fluorometers were calibrated using commercially purified chlorophyll.

120 All <sup>14</sup>C-assimilation rates were reprocessed to insure uniform treatment. Integrated primary productivity rates were computed through the 0.1% isolume depth, after the report of El-Sayed et al. (1983) that indicated that a 1% euphotic zone depth was inappropriate for phytoplankton assemblages growing in relatively deep mixed layers and adapted to low light levels. The 0.1% isolume depth was set equal to zero <sup>14</sup>C-assimilation. We note that often the 1 and 0.1% isolume samples were not statistically different (based on the number of disintegrations per minute of the filters), so that integration to the 0.1% 125 isolume depth had little impact on integrated productivity. Assimilation numbers (carbon fixation per unit chlorophyll) were also computed for each depth. In addition to the rates of <sup>14</sup>C-assimilation, chlorophyll and the dominant phytoplankton functional group are listed (Table 2). A total of 3,511 independent productivity values are reported.

Mixed layer depths were determined from the sigma-t values from CTD casts, and defined as a change of 0.01 kg m<sup>-3</sup> from a stable surface value. This is a conservative choice but was used to define a mixed layer in water columns were

130 stratification is very weak (e.g., Smith et al., 2000, 2013). In the vast majority of stations, mixed layer depths calculated by a change of 0.01 and 0.02 kg m<sup>-3</sup> were the same, and a refined determination of mixed layer based on chlorophyll or fluorescence was not attempted (Carvalho et al., 2017). At the few stations where mixed layers were greater than 150 m, a mixed layer depth of 150 m was listed.

135 Characterization of the dominant functional group was at times qualitative. Biomass of a particular group is often difficult to directly measure, and cell numbers provide a completely different measure of the abundance and ecological importance of a particular group, as smaller cells are often much more numerically common but constitute a small portion of the total carbon-equivalent biomass. This is particularly true in the Ross Sea, where the two dominant functional groups are diatoms and haptophytes – specifically the colonial haptophyte *Phaeocystis antarctica*. Diatoms tend to be large (ranging from 10 to 200 μm), whereas individual cells of *P. antarctica* are ca. 5 μm in diameter, but are often embedded in a mucopolysaccharide sheath that houses thousands of cells (Mathot et al., 2000). Colonies reach 2 mm in diameter. Both diatoms and haptophytes have similar pigments, as both contain fucoxanthin, but *P. antarctica* having larger amounts of 19'-hexanoylfucoxanthin than diatoms; diatoms, in contrast, have chlorophyll c<sub>3</sub> (DiTullio et al., 2003). As a result, using chemical characteristics of pigments is the most powerful means of distinguishing the dominance of certain functional groups and their contribution to total chlorophyll. Diatoms also have a cell wall that includes silica, and haptophytes do not; hence the presence of large amounts of biogenic silica suggest substantial accumulation of diatoms. All of these were at times used to distinguish the dominant functional group at each station. The seasonal progression of phytoplankton in the Ross Sea is generally described as an initial spring bloom of *Phaeocystis* followed by the growth and accumulation of diatoms (Smith et al., 2014), and while the description does not capture all of the spatial and temporal variability found in the Ross Sea, it is supported by the temporal pattern of dominance determined at the productivity stations.

### 150 3 Quality Control

As assimilation numbers in polar waters are similar to  $P_{max}^B$  values ( $P_{max}^B$  is the maximum rate of photosynthesis within the water column when normalized to chlorophyll; Boumann et al., 2018), any assimilation numbers that were over four times the standard deviation of the mean assimilation number at that specific irradiance in that cruise were checked for fidelity in both the carbon assimilation rates and chlorophyll concentrations. *In situ* fluorescence patterns from the CTD casts often allowed for an assessment of the reliability of those values; if chlorophyll values were considered to be reliable, then the <sup>14</sup>C-uptake values were inspected for spurious values. Using this method, 6 assimilation number values were filtered (from two of the 449 stations).

### 4 Results

160 The mean primary productivity measured by <sup>14</sup>C-uptake incubations was 1,099 ± 1,199 g C m<sup>-2</sup> d<sup>-1</sup> (Fig. 2; n = 483; minimum 10.4 and maximum 13,072 g C m<sup>-2</sup> d<sup>-1</sup>; Table 3), with the minimum occurring in ice-covered waters in April, when solar radiation was greatly reduced. The maximum rate occurred on December 22 during a large bloom of diatoms.

Productivity within the water column exhibited a broad maximum from the surface to the 15% isolume, with only a modest (18.8%) decrease at the surface relative to 30% of surface irradiance (Fig. 2). Chlorophyll decreased by 13.8% at the surface relative to the chlorophyll maximum isolume (Table 3), suggested that while photoinhibition of fluorescence and productivity did occur at the surface, it was relatively minor. Positive productivity was often observed at the 1% irradiance depth, confirming El-Sayed's suggestion that the euphotic zone in the Ross Sea could be deeper than the generally assumed 1% light depth. Chlorophyll concentrations were also relatively uniform through the 15% light level and decreased slightly below that, although the decrease was far less than for primary productivity (Fig. 2). Assimilation numbers were also relatively uniform throughout the upper euphotic zone, and for the 100, 50 and 30% isolumes averaged  $0.98 \text{ mg C (mg chl)}^{-1} \text{ h}^{-1}$  (Fig. 2), similar to the maximum photosynthetic rate compiled for the Ross Sea continental shelf from photosynthesis/irradiance experiments ( $1.10 \text{ mg C (mg chl)}^{-1} \text{ h}^{-1}$ ; Smith and Donaldson, 2015).

The temporal patterns of phytoplankton composition and biomass in the Ross Sea are relatively well known (Arrigo et al., 1999; Smith et al., 2000, 2011, 2014). Spring blooms begin at the latest by the end of October, although further analysis suggests that the onset of growth is at least one month earlier (Zhong and Smith, unpubl.). Growth in early spring is thought to be limited by irradiance, as reduced irradiance levels are imposed by ice cover, low solar angles, and deeper vertical mixing. The temporal changes in mixed layer depths are similar to modelled changes and observations within one year (e.g., Smith et al., 2000; Smith and Jones, 2015), with minimum mixed layer depths occurring in mid-December and generally remaining low through much of January (Fig. 3). Mean monthly mixed layer depths from October through February were 101, 58.5, 26.8, 21.8 and 30.6 m. Based on chlorophyll concentrations from incubations, chlorophyll was maximal around December 21, but greater than  $2 \mu\text{g L}^{-1}$  from Nov. 21 through the end of December (Fig. 4). Surface and integrated productivity paralleled biomass, with maxima co-occurring with chlorophyll concentrations (Fig. 4). Indeed, surface chlorophyll and surface primary productivity were significantly correlated ( $R^2 = 0.669$ ;  $p < 0.0001$ ) as were surface and integrated productivity ( $R^2 = 0.737$ ;  $p < 0.001$ ). Annual integrated productivity (calculated from the data in Fig. 4) equals  $146 \text{ g C m}^{-2} \text{ yr}^{-1}$ . The maxima of all three variables correspond to the maximum of *P. antarctica* concentrations that have been repeatedly observed. However, recent investigations of temporal changes in the particulate organic carbon:chl ratio (Smith and Kaufman, 2018; Ryan-Keogh and Smith, 2021; Chen et al., 2021) suggested that summer productivity (that is, after the *Phaeocystis* bloom had dissipated) remained elevated and is not adequately assessed by chlorophyll-based satellite bio-optical models such as that of Schine et al. (2015). The mean productivity values do not directly support this, but it is worth noting that integrated productivity rates in January were still substantial.

The importance of mixed layers in regulating the growth and accumulation of phytoplankton has long been recognized in polar oceans (Sverdrup, 1953; Mitchell and Holm-Hansen, 1990; Nelson and Smith, 1991; Smith and Jones, 2015). In general, deeper mixed layers reduce the mean irradiance available for photosynthesis, as well as mixing low chlorophyll water from depth with waters in the surface layer which have greater concentrations of biogenic material, thus "diluting" particulate matter in the mixed layer. Mitchell and Holm-Hansen (1990) suggested that in the Southern Ocean mixed layers greater than 40 m would preclude positive photosynthesis; however, Smith and Jones (2015) showed that in the Ross Sea there were specific

conditions that clearly did not support this hypothesis. In addition, it has been suggested from laboratory and field investigations that *P. antarctica* is capable of utilizing reduced irradiance levels in deep mixed layers, thus allowing it to grow in spring (e.g., Kropuenske et al., 2009; Tozzi and Smith, 2017). Indeed, the data of Smith and Jones (2015) where deep mixed layers supported a very large standing stock of chlorophyll were stations that were largely dominated by *Phaeocystis*. To see  
200 if the productivity data supported this hypothesis, the relationship of chlorophyll concentrations within the mixed layer were analysed (Fig. 5). No simple relationship like those found in individual cruises was apparent, nor was there a relationship from stations dominated by *Phaeocystis* or those dominated by diatoms. This may have resulted from a number of factors. Mixed layers are actually homogeneous layers, and can be substantially greater than active mixing layers (Taylor and Ferrari, 2011). Also, the time scales of mixing can be less than one day (that is, water column mixing responds relatively rapidly to a change  
205 in wind speed or ice-generated mixing), whereas chlorophyll concentrations under low irradiance conditions might require a number of days to respond. Determining the relevant time scales of each during an oceanographic cruise is exceptionally difficult. Finally, it is well known that phytoplankton acclimate to low irradiance conditions by increasing the amount of chlorophyll per cell, and therefore chlorophyll changes may be related more to photophysiological changes than actual growth (e.g., Geider et al., 1998). Chlorophyll also can be influenced by iron supply as well (Price et al., 2005). Hence the relationship  
210 of chlorophyll to mixed layer depths can be obscured by the other factors operating within the water column.

The relationship between the 1% isolume depth and integrated chlorophyll concentrations was characterized by an exponential decay response, which is expected given the importance of phytoplankton particles to irradiance attenuation (Fig. 6). No difference was apparent between stations dominated by haptophytes, diatoms or those with a mixed assemblage (t-test;  $p > 0.05$ ). The pooled values are best represented by the equation

$$215 \quad Z_{E_{1\%}} = 29.6 + 170.6 \times e^{-0.152 \int_{1\%}^0 Chl} \quad (1)$$

where  $Z_{E_{1\%}}$  is the 1% isolume depth and  $\int_{1\%}^0 Chl$  is the integrated chlorophyll concentration from the surface to the 1% isolume depth ( $R^2 = 0.52$ ,  $p < 0.001$ ).

Phytoplankton composition appeared to change from an assemblage largely dominated by *P. antarctica* to one largely composed of diatoms (Table 4), despite the qualitative assignment of “dominance” through the use of various metrics. The  
220 transition of an assemblage dominated by *P. antarctica* to one composed of diatoms or a mixed assemblage of diatoms and haptophytes begins in late December, and while substantial spatial variability occurs in the distribution of both groups over the entire continental shelf, it is consistent with the observations on various scales of time and space (e.g., Frago and Smith, 2012; Liu and Smith, 2012; Kaufman et al. 2014; Ryan-Keogh and Smith, 2021). The first date of a mixed diatom-haptophyte assemblage was on November 21, and a diatom-dominated assemblage was observed on November 26 and 27. However, most  
225 stations during November and December were haptophyte-dominated. Haptophytes never completely disappeared, but solitary cells likely became the dominant form after colonies disappeared (Smith et al., 2003; Jones and Smith, 2017), but diatoms became much more abundant and dominant in January and February. Only 1 station had a cryptomonad dominance; dominance by this group is likely stimulated by glacial run-off and likely is restricted to narrow bands near the coast of Victoria Land

(Moline et al., 2004). Interestingly, *P. antarctica* was dominant (albeit in extremely low chlorophyll concentrations and under  
230 100% ice cover) in April at the few stations that have been sampled. Should the species be able to remain in low concentrations  
throughout winter, it might help explain its early growth as sea ice begins to recede (and irradiance increases) in spring.  
Additionally, molecular analyses have suggested that *P. antarctica* may have heterotrophic capabilities (Rizkallah et al., 2020),  
but direct examination of this ability has so far failed to demonstrate the haptophyte's ability to grow on reduced organic  
substrates (D. Caron, pers. comm.).

235

## 5 Data Availability

All compiled data containing the 3,512 depths and 492 stations are available at the Biological and Chemical Oceanography  
Data Management Office (BCO-DMO) available at <https://www.bco-dmo.org/dataset/863815/>. Integrated water column data  
and PAR information are available as a supplemental file at the same site. If additional data for a specific cruise or group of  
240 cruises is of interest, it can be obtained directly from the author and/or the requisite data repository.

## 6 Recommendations for the use of these data

This data set from the Ross Sea has multiple uses and is of value to numerous investigators. The first would be as a  
comprehensive data base to generate new models of satellite productivity, given that present estimates of chlorophyll and  
245 biomass from satellite data are inadequate (Chen et al., 2021). These data will provide a clear data base to test the validity of  
productivity models not only of the Ross Sea but of other continental shelf regions in the Antarctic. A second use might be to  
assess the role of ecological hot spots – those restricted areas that are characterized by elevated primary productivity and serve  
as regions of enhanced ecological importance in food webs. They also provide a baseline for ecological investigation of  
biogeochemical cycles and trophic ecology.

250

## 7 Conclusions

The synthesis of productivity data from the Ross Sea demonstrates the patterns of productivity that have previously only  
been inferred; that is, productivity is characterized as a unimodal peak during late December, and closely follows the biomass  
of the system throughout the entire growing season. Productivity can be substantial; the maximum primary production rate  
255 measured was  $13.1 \text{ g C m}^{-2} \text{ d}^{-1}$ . Annual integrated productivity is estimated to be  $146 \text{ g C m}^{-2} \text{ yr}^{-1}$ . Chlorophyll-specific  
productivity rates in the upper surface layer average  $0.98 \text{ mg C (mg chl)}^{-1} \text{ h}^{-1}$ , similar to the rate found in short-term  
photosynthesis-irradiance experiments. Previously hypothesized relationships between mixed layer depths and productivity  
are not supported by this synthesis, and no clear relationship was observed between assemblage composition and mixed layers.  
Photoinhibition at the surface occurred, but only decreased productivity by ca. 18%. Despite the potential uncertainties in the  
260 measurement of productivity, this synthesis confirms that the Ross Sea continental shelf is the most productive region of the  
Southern Ocean.



**Competing interests.** The author declares that he has no conflict of interest.

265

**Acknowledgements.** The author would like to thank the many co-workers, students, colleagues, and friends who helped collect the samples under sub-optimal conditions in a challenging environment. He also acknowledges the consistent funding of the U.S. National Science Foundation (Office of Polar Programs). Dr. Richard Barber taught him the “tools of the trade” of radioisotope work and its limitations. Publication of this data set was funded by China NSF awards 41876228 and 41941008.

## 270 **References**

- Arrigo, K.R., Robinson, D.H., Worthen, D.L., Dunbar, R.B., DiTullio, G.R., vanWoert, M., and Lizotte, M.P.: Phytoplankton community structure and the drawdown of nutrients and CO<sub>2</sub> in the Southern Ocean. *Science*, 283, 365-7, 1999.
- Arrigo, K.R., van Dijken, G., and Long, M.: Coastal Southern Ocean: A strong anthropogenic CO<sub>2</sub> sink. *Geophysical Research Letters*, 35, L21602, <https://doi:10.1029/2008GL035624>, 2008.
- 275 Barber, R.T., Borden, L., Johnson, Z., Marra, J., Knudson, C., and Trees, C.: Ground truthing modeled k<sub>par</sub> and on deck primary productivity incubations with in situ observations. *Proc. SPIE*, 2963, 834–839, <http://doi:10.1117/12.266409>, 1997.
- Basu, S., and Mackey, K.R.M.: Phytoplankton as key mediators of the biological carbon pump: their responses to a changing climate. *Sustainability*, 2018, 10, 869, <https://doi:10.3390/su10030869>, 2018.
- 280 Boumann, H.A., Platt, T., Doblin, M., Figueriras, F.G., Gudmundsson, K., Gudfinnsoson, H.G., Huang, B., Hickman, A., Hiscock, M., Jackson, T., Lutz, V.A., Mélin, F., Rey, F., Pepin, P., Segura, V., Tilsone, G.H., van Dongen-Vogels, V., and Sathyendranath, S.: Photosynthesis-irradiance parameters of marine phytoplankton: synthesis of a global data set. *Earth Syst. Sci. Data*, 10, 251–266, <https://doi.org/10.5194/essd-10-251-2018>, 2018.
- Behrenfeld, M J., and Falkowski, P.G.: A consumer’s guide to phytoplankton primary productivity models. *Limnol. Oceanogr.*, 285 42, 1479-1491, 1997a.
- Behrenfeld, M J., and Falkowski, P.G.: Photosynthetic rates derived from satellite-based chlorophyll concentration. *Limnol. Oceanogr.*, 42, 1–20, <https://doi:10.4319/lo.1997.42.1.0001>, 1997b.
- Carvalho, F., Kohut, J., Oliver, M.J., and Schofield, O.: Defining the ecologically relevant mixed-layer depth for Antarctica’s coastal seas. *Geophys. Res. Letters*, 44, 338–345, <https://doi:10.1002/2016GL071205>, 2017.
- 290 Chen, S., Smith, Jr., W.O., Yu, X., and Yang, L.: Revisiting the ocean color algorithms for particulate organic carbon and chlorophyll-a concentrations in the Ross Sea. *J. Geophys. Res.*, 126, e2021JC017749. <https://doi.org/10.1029/2021JC017749>, 2021.

- DiTullio, G.R., Geesey, M.E., Leventer, A., and Lizotte, M.P.: Algal pigment ratios in the Ross Sea: implications for CHEMTAX analysis of Southern Ocean data. *Ant. Res. Ser.*, 78, 35-52, 2003.
- 295 El-Sayed, S.Z., Biggs, D.C., and Holm-Hansen, O.: Phytoplankton standing crop, primary productivity, and near-surface nitrogenous nutrient fields in the Ross Sea, Antarctica, *Deep-Sea Res.*, 30, 871-886, 1983.
- Eppley, R.W.: The PRPOOS program: A study of plankton rate processes in oligotrophic oceans. *EOS. Trans. Am. Geophys. Union*, 163, 522, <https://doi:10.1029/EO063i022p00522-01>, 1982.
- 300 Fragoso, G.M., and Smith, Jr., W.O.: Influence of hydrography on phytoplankton distributions in the Amundsen and Ross Seas, Antarctica. *J. Mar. Systems*, 89, 19-29, 2012.
- Geider, R.J., Macintyre, H.L., and Kana, T.M.: A dynamic regulatory model of phytoplankton acclimation to light, nutrients, and temperature. *Limnol. Oceanogr.*, 43, 679–694, 1998.
- Hiscock, M.R., Lance, V.P., Apprill, A.M., Johnson, Z., Bidigare, R.R., Mitchell, B.G., Smith, Jr., W.O., and Barber, R.T.: Photosynthetic maximum quantum yield increases are essential components of Southern Ocean phytoplankton iron response. *Proc. Nat. Acad. Sciences*, 105, 4775 - 4780, 2008.
- 305 Kaufman, D.E., Friedrichs, M.A.M., Smith, Jr., W.O., Queste, B.Y., and Heywood, K.J.: Biogeochemical variability in the southern Ross Sea as observed by a glider deployment. *Deep-Sea Res. I*, 92, 93-106, 2014.
- Knap, A., Michaels, A., Close, A., Ducklow, H., and Dickson, A.: Protocols for the Joint Global Ocean Flux Study (JGOFS) Core Measurements, JGOFS Report Nr. 19, 1996.
- 310 Kropuenske, L.R., Mills, M.M., van Dijken, G.L., Bailey, S., Robinson, D.H., Welschmeyer, N.A., and Arrigo, K.R.: Photophysiology in two major Southern Ocean phytoplankton taxa: Photoprotection in *Phaeocystis antarctica* and *Fragilariopsis cylindrus*. *Limnol. Oceanogr.*, 54, 1176-1196, 2009.
- Jones, R.M., and Smith Jr., W.O.: The influence of short-term events on the hydrographic and biological structure of the southwestern Ross Sea. *J. Mar. Syst.* 166, 184–195, 2017.
- 315 Liu, X., and Smith, Jr., W.O.: A statistical analysis of the controls on phytoplankton distribution in the Ross Sea, Antarctica. *J. Mar. Systems*, 94, 135-144, 2012.
- Marra, J. F.: Net and gross productivity: weighing in with <sup>14</sup>C. *Aq. Micro. Ecol.*, 56, 123-131, 2009.
- Marra, J. F., Barber, R.T., Barber, E., Bidigare, R.R., Chamberlin, W.S., Goericke, R., Halloran, C., Hargreaves, B.R., Hiscock, M., Johnson, Z.I., Kiefer, D.A., Kinkade, C., Knudson, C., Lance, V., Langdon, C., Lee, Z.-P., Perry, M.J., Smith, Jr., 320 W.O., Vaillancourt, R., and Zoffoli, L.: A database of ocean primary productivity from the <sup>14</sup>C method. *Limnol. Oceanogr. Letters*, 6, 107-111. <https://doi.org/10.1002/lol2.10175>, 2021.
- Mathot, S., Smith, W.O., Jr., Carlson, C.A., and Garrison, D.L.: Estimate of *Phaeocystis* sp. carbon biomass: methodological problems related to the mucilaginous nature of the colonial matrix. *J. Phycol.*, 36, 1049 – 1056, 2000.
- Mitchell, B.G., and Holm-Hansen, O.: Observations and modeling of the Antarctic phytoplankton crop in relation to mixing 325 depth. *Deep-Sea Research*, 38: 981-1007, 1990.

- Moline, M.A., Claustre, H., Frazer, T.K., Schofield, O., and Vernet, M.: Alteration of the food web along the Antarctic Peninsula in response to a regional warming trend. *Global Change Biol.*, 10, 1973-1980, 2004.
- Mouw, C.B., and Yoder, J.A.: Primary production calculations in the Mid-Atlantic Bight, including the effects of phytoplankton community size structure. *Limnol. Oceanogr.*, 50, 1232-1243.
- 330 Nelson, D.M., and Smith, W.O. Jr.: Sverdrup revisited: critical depths, maximum chlorophyll levels and the control of Southern Ocean productivity by the irradiance/mixing regime. *Limnol. Oceanogr.*, 36, 1650-1661, 1991.
- Oliver, H., Zhang, W.G., Smith, W.O. Jr., Alatalo, P., Hirzel, A., H.M. Sosik, Stanley, R.H.R., and McGillicuddy, Jr., D.J.: Diatom hotspots driven by western boundary current instability. *Geophys. Res. Letters*, 48, e2020GL091943. <https://doi.org/10.1029/2020GL091943>, 2021.
- 335 Price, N.M.: The elemental stoichiometry and composition of an iron-limited diatom. *Limnol. Oceanogr.*, 50, 1159-1171, 2005.
- Rizkallah, M.R., Frickenhaus, S., Trimborn, S., Harms, L., Moustafa, A., Bence, V., Gäbler-Schwarz, S., and Beszleri, S.: deciphering patterns of adaptation and acclimation in the transcriptome of *Phaeocystis antarctica* to changing iron conditions. *J. Phycol.*, 56, 747-760, 2020.
- Ryan-Keogh, T.R., and Smith, W.O., Jr.: Temporal patterns of iron limitation in the Ross Sea as determined from chlorophyll fluorescence. *J. Mar. Systems*, 215, <https://doi.org/10.1016/j.jmarsys.2020.103500>, 2021.
- 340 Schine, C.M.S., van Dijken, G., and Arrigo, K.R.: Spatial analysis of trends in primary production and relationships with large-scale climate variability in the Ross Sea, Antarctica (1997–2013). *J. Geophys. Res.*, 120, 1–19, <https://doi.org/10.1002/2015JC011014>, 2015.
- Sedwick, P.N., Marsay, C.M., Aguilar-Islas, A.M., Lohan, M.C., Sohst, B.M., Long, M.C., Arrigo, K.R., Dunbar, R.B., Saito, M.A., Smith, W.O. Jr., and DiTullio, G.R.: Early-season depletion of dissolved iron in the Ross Sea polynya: Implications for iron dynamics on the Antarctic continental shelf. *J. Geophys. Res.*, 116, C12019, <https://doi:10.1029/2010JC006553>, 2011.
- 345 Smith, W.O. Jr.: Primary productivity and new production in the Northeast Water polynya during summer, 1992. *J. Geophys. Res.*, 100, 4357-4370, 1995.
- 350 Smith, W.O. Jr., Ainley, D.G., Arrigo, K.R., and Dinniman, M.S.: The oceanography and ecology of the Ross Sea. *Annu. Rev. Mar. Sci.*, 6, 469-487, 2014.
- Smith, W.O. Jr., Asper, V., Tozzi, S., Liu, X., and Stammerjohn, S.E.: Surface layer variability in the Ross Sea, Antarctica as assessed by in situ fluorescence measurements. *Prog. Oceanogr.*, 88, 28-45, <https://doi:10.1016/j.pocean.2010.08.002>, 2011.
- 355 Smith, W.O., Jr., and Donaldson, K.: Photosynthesis-irradiance responses in the Ross Sea, Antarctica: a meta-analysis. *Biogeosci.*, 12: 1-11, 2015.
- Smith, W.O., Jr., Dennett, M.R., Mathot, S., and Caron, D.A.: The temporal dynamics of the flagellated and colonial stages of *Phaeocystis antarctica* in the Ross Sea. *Deep-Sea Res. II*, 50, 605-618, 2003.

- Smith, W.O., Jr., and Gordon, L.I.: Hyperproductivity of the Ross Sea (Antarctica) polynya during austral spring. *Geophys. Res. Letters*, 24, 233 - 236, 1997.
- 360 Smith, W.O., Jr., and Jones, R.M.: Vertical mixing, critical depths, and phytoplankton growth in the Ross Sea. *ICES J. Mar. Science*, 72, 1952-1960, 2015.
- Smith, W.O., Jr., and Kaufman, D.E.: Particulate organic carbon climatologies in the Ross Sea: evidence for seasonal acclimations within phytoplankton. *Prog. Oceanogr.*, 168, 182-195, <https://doi.org/10.1016/j.pocean.2018.10.003>, 2018.
- 365 Smith, W.O., Jr., Marra, J., Hiscock, M.R., and Barber, R.T.: The seasonal cycle of phytoplankton biomass and primary productivity in the Ross Sea, Antarctica. *Deep-Sea Res. II*, 47, 3119 - 3140, 2000.
- Smith, W.O., Jr., Nelson, D.M., DiTullio, G.R., and Leventer, A.R.: Temporal and spatial patterns in the Ross Sea: Phytoplankton biomass, elemental composition, productivity and growth rates. *J. Geophys. Res.*, 101, 18,455 - 18,466, 1996.
- 370 Smith, W.O., Jr., Nelson, D.M., and Mathot, S.: Phytoplankton growth rates in the Ross Sea determined by independent methods: temporal variations. *J. Plankton Res.*, 21, 1519-1536, 1999.
- Smith, W.O., Jr., Zhang, W.G., Hirzel, A., Stanley, R.H.R., Meyer, M.G., Sosik, H.M., Alatalo, P., Sandwith, Z., Oliver, H., Mishra, A., and McGillicuddy, Jr., D.J.: A regional, early spring bloom of *Phaeocystis pouchetii* on the New England continental shelf. *J. Geophys. Res.*, 126, e2020JC016856, <https://doi.org/10.1029/2020JC016856>, 2021.
- 375 Steemann Nielsen, E.: The use of radioactive carbon ( $C^{14}$ ) for measuring organic production in the sea. *J. Cons. Int. Explor. Mer*, 18, 117-140, <https://doi:10.1093/icesjms/18.2.117>, 1952.
- Sverdrup, H.U.: On conditions for the vernal blooming of phytoplankton. *J. Cons. Int. Explor. Mer* 18: 287-295, 1953.
- Taylor, J.R., and Ferrari, R.: Shutdown of turbulent convection as a new criterion for the onset of spring phytoplankton blooms. *Limnol. Oceanogr.*, 56, 2293-2307, 2011.
- 380 Tozzi, S., and Smith, W.O., Jr.: Contrasting photo-physiological responses of the haptophyte *Phaeocystis antarctica* and the diatom *Pseudonitzschia* sp. in the Ross Sea (Antarctica). *AIMS-Geosci.*, 3, 142-162, 2017. <https://doi:10.3934/geosci.2017.2.142>
- Wilson, D.L., Smith, Jr., W.O., and Nelson, D.M.: Phytoplankton bloom dynamics of the western Ross Sea ice edge I. Primary productivity and species-specific production. *Deep-Sea Res.*, 33, 1375-1387, 1986.

385

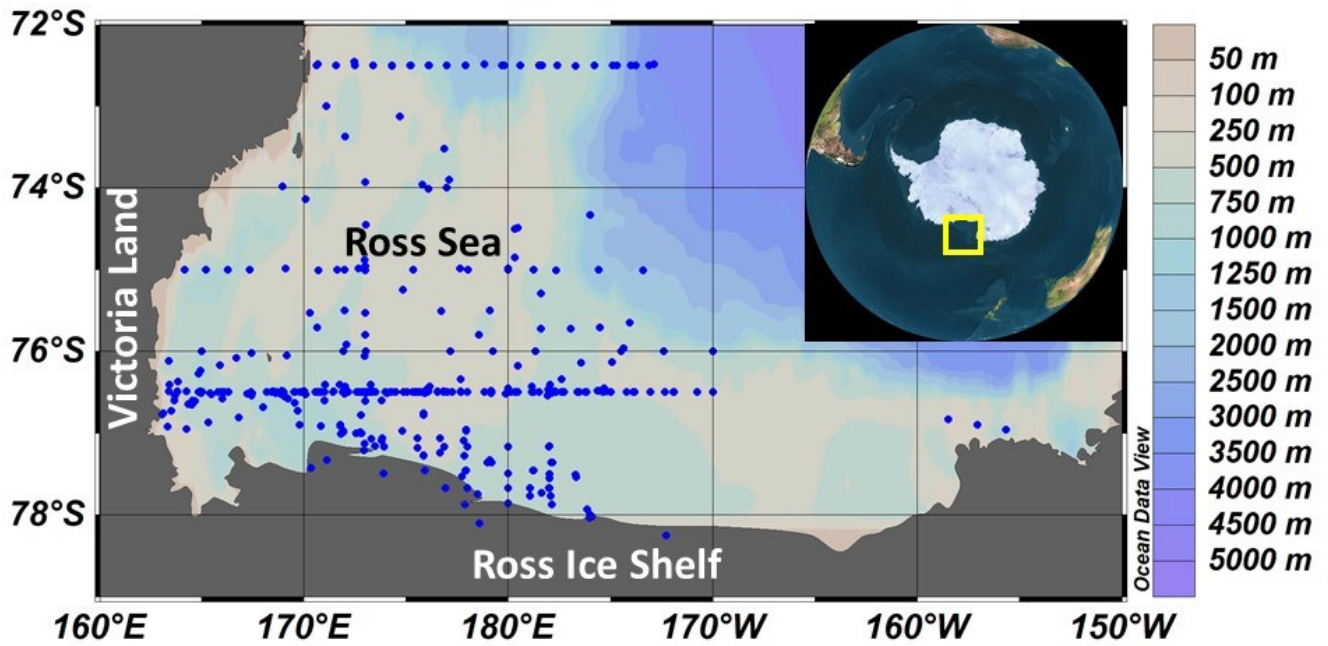

390 Figure 1: Station map of all productivity stations included in this analysis. The yellow box in the insert shows the location of the Ross Sea.

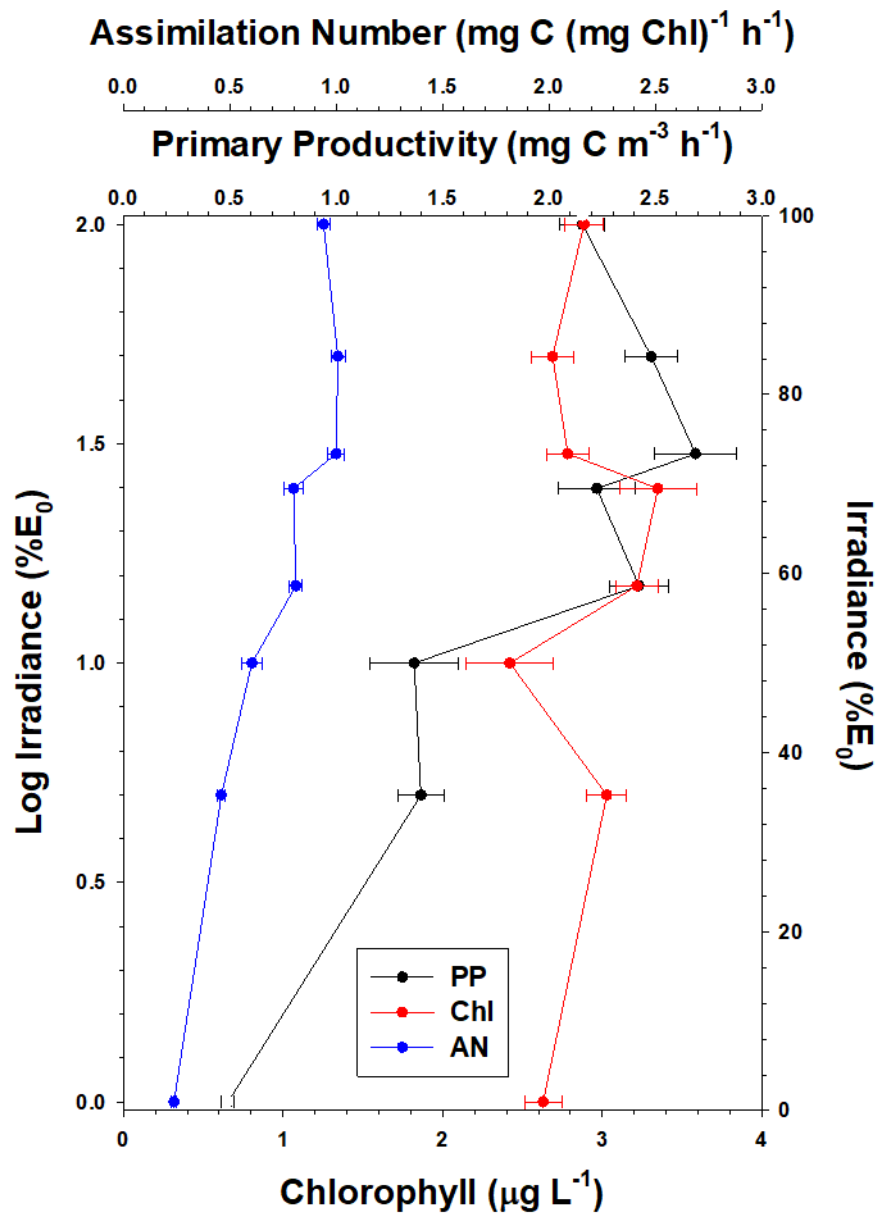

395

Figure 2: Vertical distribution of average primary productivity, chlorophyll concentrations, and assimilation numbers in the Ross Sea. Error bars represent standard errors.

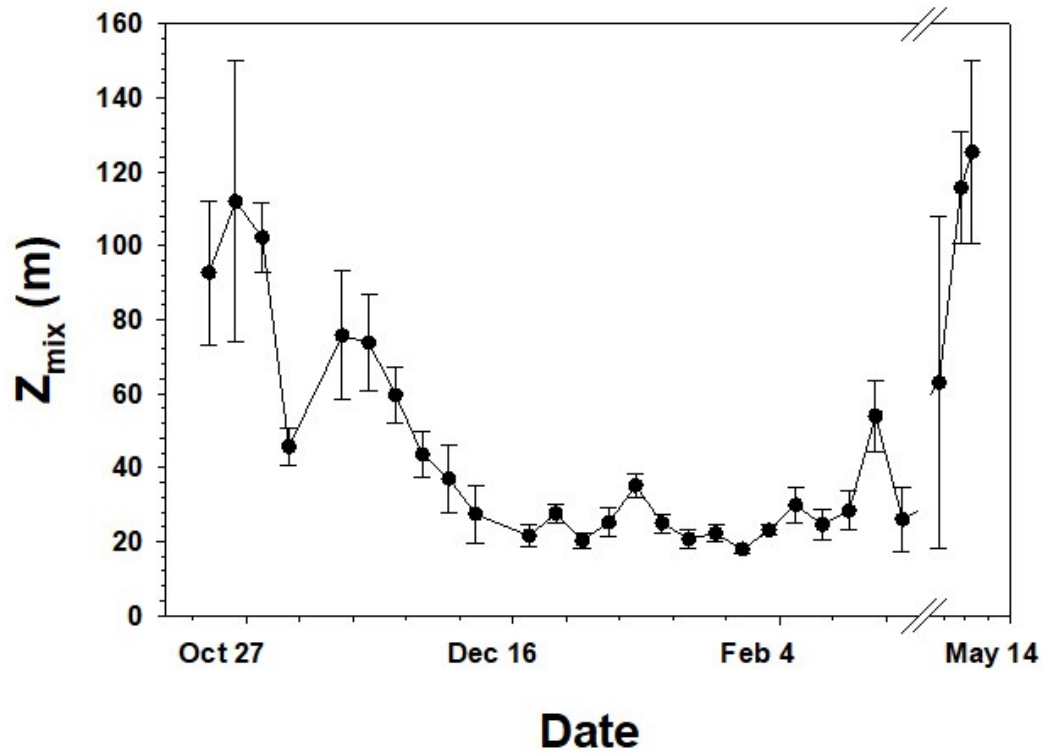

400 Figure 3: Seasonal progression of mixed layer depth ( $Z_{mix}$ ). All mixed layers greater than 150 m were set equal to 150 m. Error bars represent the standard deviation from the mean.

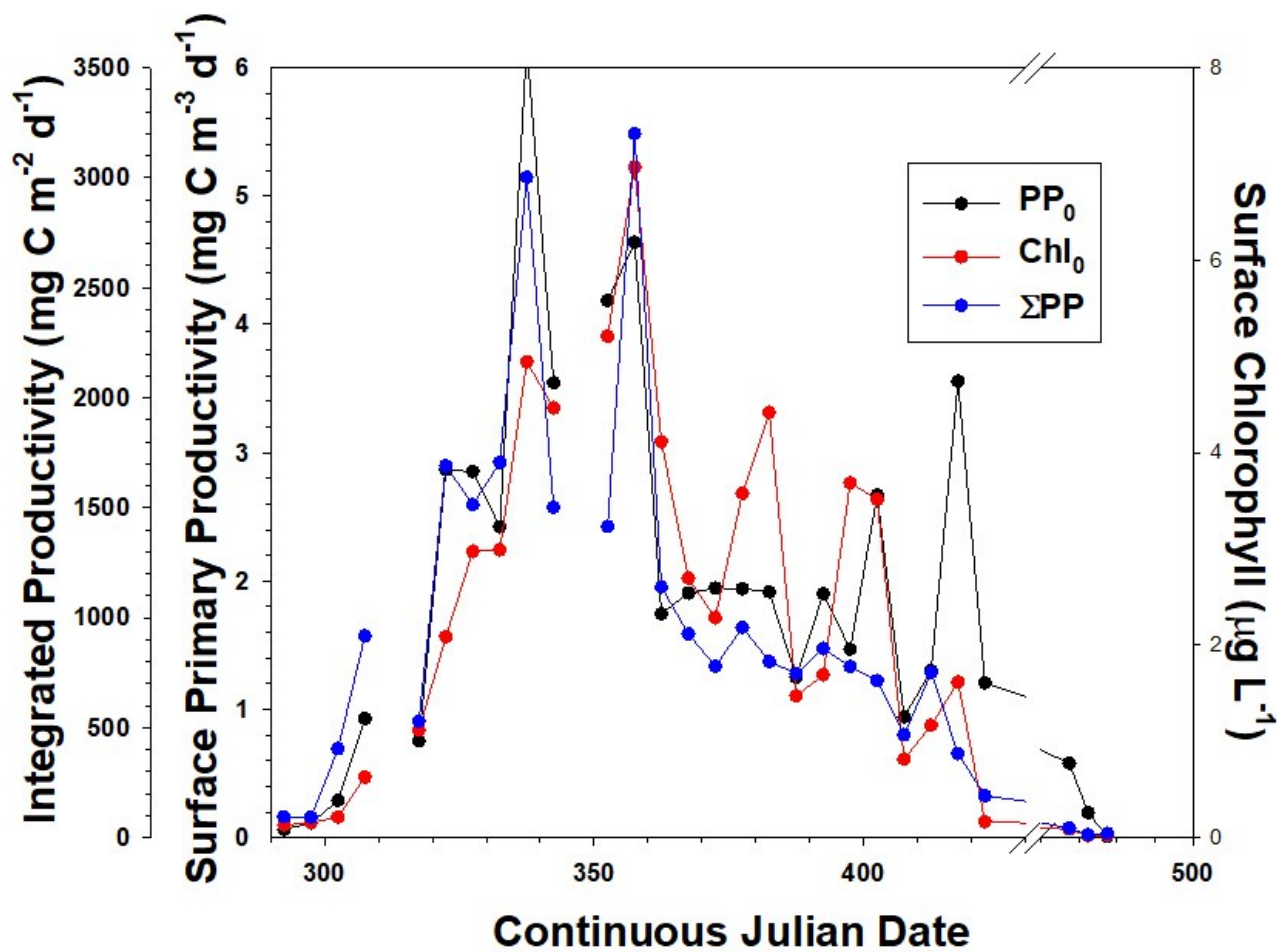

405 Figure 4: Temporal distribution of surface and integrated primary productivity (through the 0.1% isolume) and surface chlorophyll concentrations. Data were binned in 5-day intervals, and each bin had different numbers of samples (ranging from 2 to 27 values in the bin).



410

415

420

425

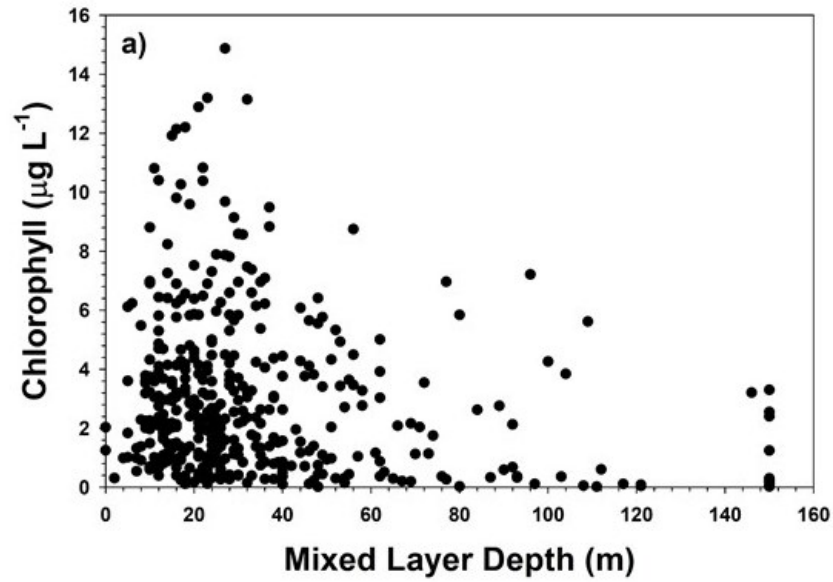

430

435

440

445

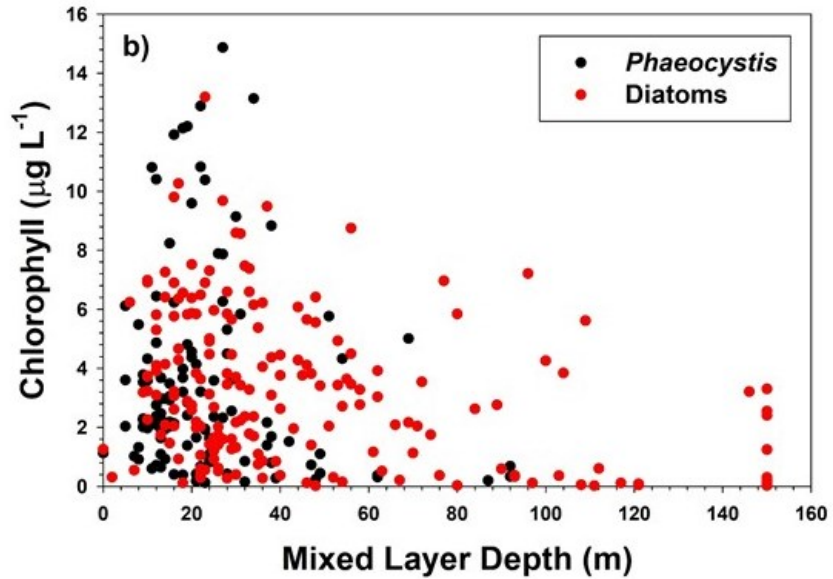

450

Figure 5a) Relationship of mixed layer chlorophyll concentrations with mixed layer depth, and b) relationship of chlorophyll concentrations at stations dominated by either diatoms or *Phaeocystis* to mixed layer depths.

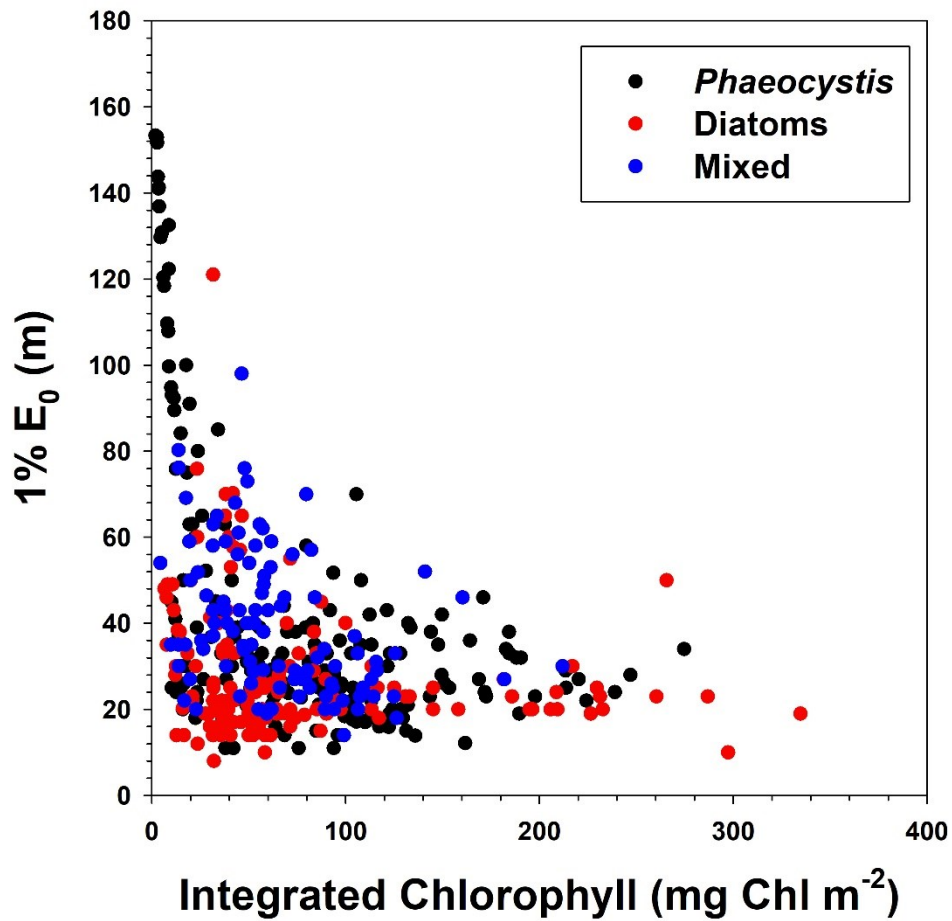

455 **Figure 6:** Relationship between integrated chlorophyll concentrations (integrated through the 1% isolume depth) and the 1% isolume depth. The data set was divided among stations dominated by *Pcystis antarctica* (black dots), diatoms (red dots) and mixed assemblages (blue dots). The relationship was best described by an exponential decay equation and was highly significant ( $R^2 = 0.52$ ;  $p < 0.001$ ).

**Table 1. Name and dates in which 14C-productivity measurements were made, along with the number of stations completed and the reference that published those data.**

| <b>Cruise</b>                 | <b>Dates</b>           | <b>Number of<br/>Productivity Stations</b> | <b>Reference</b>        |
|-------------------------------|------------------------|--------------------------------------------|-------------------------|
| <i>Glacier</i> 1983: Leg I    | 1/26 – 2/2/1983        | 33                                         | Wilson et al. (1985)    |
| <i>Glacier</i> 1983: Leg II   | 2/2-8/1983             | 6                                          | Wilson et al. (1985)    |
| <i>Polar Duke</i> 1990        | 1/13 – 2/2/1990        | 68                                         | Smith et al. (1996)     |
| <i>Polar Duke</i> 1992        | 2/5-28/1992            | 45                                         | Smith et al. (1996)     |
| <i>N.B. Palmer</i> 94-06      | 11/14 – 12/8/1994      | 45                                         | Smith and Gordon (1997) |
| <i>N.B. Palmer</i> 95-08      | 12/20/1995 – 1/20/1996 | 58                                         | Smith et al. (1999)     |
| <i>N.B. Palmer</i> 96-04      | 10/18 – 11/4/1996      | 14                                         | Smith et al. (2000)     |
| <i>N.B. Palmer</i> 97-01      | 1/13 – 2/8/1997        | 23                                         | Smith et al. (2000)     |
| <i>N.B. Palmer</i> 97-03      | 4/12 – 29/1997         | 12                                         | Smith et al. (2000)     |
| <i>N.B. Palmer</i> 97-08      | 11/15 – 12/10/1997     | 34                                         | Smith et al. (2000)     |
|                               |                        |                                            | Hiscock et al. (2001)   |
| <i>Polar Sea</i> 2001: Leg I  | 12/19 - 21/2001        | 8                                          | Smith (unpubl.)         |
| <i>Polar Sea</i> 2001: Leg II | 2/2 – 6/2002           | 8                                          | Smith (unpubl.)         |
| <i>Polar Sea</i> 2002: Leg I  | 12/23 – 24/2002        | 3                                          | Smith (unpubl.)         |
| <i>N.B. Palmer</i> 03-05      | 12-26 – 29/2003        | 9                                          | Smith (unpubl.)         |
| <i>Polar Sea</i> 2003-2004    | 2/3 – 6/2004           | 11                                         | Smith (unpubl.)         |
| <i>Polar Star</i> 2004        | 12/21 – 24/2004        | 11                                         | Smith (unpubl.)         |
| <i>N.B. Palmer</i> 05-01      | 1/29 – 2/1/2005        | 13                                         | Smith (unpubl.)         |
| <i>N.B. Palmer</i> 06-01      | 12/27/2005 – 1/9/2006  | 27                                         | Sedwick et al. (2011)   |
| <i>N.B. Palmer</i> 06-08      | 11/20 – 12/3/2006      | 21                                         | Sedwick et al. (2011)   |

Table 2. Name of the columns provided in the primary productivity table along with a description of the variable and its units.

| Header            | Description                                                                | Units                                       |
|-------------------|----------------------------------------------------------------------------|---------------------------------------------|
| CRUISE            | Name of the cruise                                                         |                                             |
| STANUM            | Station number used in publications or data source                         |                                             |
| CAST/EVENT NUMBER | CTD cast number or event number assigned in cruise (if available)          |                                             |
| LAT               | Latitude of sampling                                                       | Decimal degrees                             |
| LON               | Longitude of sampling                                                      | Decimal degrees                             |
| DATE              | Date of sample collection                                                  | Local date                                  |
| MONTH             | Month of sample collection                                                 | Local Month                                 |
| JUL               | Julian date (local)                                                        | Jan. 1 = 1                                  |
| JUL CONSEC        | Consecutive Julian Date                                                    | Jan. 1 =366                                 |
| ZMIX              | Mixed layer depth                                                          | m                                           |
| INC               | Length of incubation                                                       | h (rounded to nearest hour)                 |
| Z                 | Depth from which sample was collected                                      | m                                           |
| E                 | Percentage of surface irradiance that the sample was incubated             | %                                           |
| PP                | Primary productivity measured by <sup>14</sup> C-uptake                    | mg C m <sup>-3</sup> h <sup>-1</sup>        |
| CHL               | Chlorophyll concentration measured by fluorometry                          | mg chl m <sup>-3</sup>                      |
| AN                | Assimilation number (rate of carbon fixation per unit of chlorophyll)      | mg C (mg chl) <sup>-1</sup> h <sup>-1</sup> |
| INT-PP            | Primary productivity integrated from the surface to the 0.1% isolume depth | mg C m <sup>-2</sup> d <sup>-1</sup>        |
| INT-CHL           | Chlorophyll integrated through the 1% isolume                              | mg chl m <sup>-2</sup>                      |
| INT-PAR           | Integrated photosynthetically active radiation (400-700 nm)                | mol photons m <sup>-2</sup> d <sup>-1</sup> |
| PHYTO             | Dominant phytoplankton component in sampled assemblage                     |                                             |
| REF               | Data source or publication which describes the data most completely        |                                             |

**Table 3. Mean and standard deviation, maximum observed, and number of measurements of primary productivity (PP), chlorophyll concentration (Chl), and assimilation number (AN) within the euphotic zone of the Ross Sea. E = irradiance percentage; E<sub>0</sub> = surface irradiance; PP<sub>max</sub> = maximum rate of production at that isolume; Chl<sub>max</sub> = maximum chlorophyll concentration at that isolume; AN<sub>max</sub> = maximum assimilation number at that isolume; n = number of observations.**

| <b>E</b><br><b>(% of</b><br><b>E<sub>0</sub>)</b> | <b>Log</b><br><b>E</b> | <b>PP</b><br><b>(mg C m<sup>-3</sup></b><br><b>h<sup>-1</sup>)</b> | <b>PP<sub>max</sub></b><br><b>(mg C</b><br><b>m<sup>-3</sup> h<sup>-1</sup>)</b> | <b>Chl</b><br><b>(μg L<sup>-1</sup>)</b> | <b>Chl<sub>max</sub></b><br><b>(μg L<sup>-1</sup>)</b> | <b>AN</b><br><b>(mg C</b><br><b>(mg chl)<sup>-1</sup> h<sup>-1</sup>)</b> | <b>AN<sub>max</sub></b><br><b>(mg C</b><br><b>(mg chl)<sup>-1</sup> h<sup>-1</sup>)</b> | <b>n</b> |
|---------------------------------------------------|------------------------|--------------------------------------------------------------------|----------------------------------------------------------------------------------|------------------------------------------|--------------------------------------------------------|---------------------------------------------------------------------------|-----------------------------------------------------------------------------------------|----------|
| 100                                               | 2.00                   | 2.16 ± 2.33                                                        | 20.2                                                                             | 2.88 ± 2.69                              | 15.1                                                   | 0.94 ± 0.71                                                               | 4.62                                                                                    | 492      |
| 50                                                | 1.70                   | 2.48 ± 2.77                                                        | 27.1                                                                             | 2.91 ± 2.69                              | 19.1                                                   | 1.01 ± 0.72                                                               | 4.38                                                                                    | 487      |
| 30                                                | 1.48                   | 2.70 ± 3.40                                                        | 25.7                                                                             | 2.80 ± 2.34                              | 13.5                                                   | 1.00 ± 0.69                                                               | 4.09                                                                                    | 319      |
| 25                                                | 1.40                   | 2.75 ± 2.01                                                        | 25.2                                                                             | 3.27 ± 3.00                              | 17.1                                                   | 0.80 ± 0.61                                                               | 4.52                                                                                    | 166      |
| 15                                                | 1.18                   | 2.44 ± 2.85                                                        | 13.9                                                                             | 3.23 ± 2.75                              | 15.2                                                   | 0.81 ± 0.63                                                               | 4.10                                                                                    | 416      |
| 10                                                | 1.00                   | 1.32 ± 1.91                                                        | 13.5                                                                             | 2.33 ± 2.50                              | 10.3                                                   | 0.61 ± 0.48                                                               | 2.50                                                                                    | 17       |
| 5                                                 | 0.70                   | 1.41 ± 2.39                                                        | 31.9                                                                             | 3.04 ± 2.76                              | 13.6                                                   | 0.46 ± 0.40                                                               | 3.36                                                                                    | 472      |
| 1                                                 | 0.00                   | 0.49 ± 0.70                                                        | 6.71                                                                             | 2.63 ± 2.71                              | 18.8                                                   | 0.24 ± 0.33                                                               | 3.89                                                                                    | 556      |
